# Supplementary material for: Mutation-Specific Guide RNA for Compound Heterozygous Porphyria On-target Scarless Correction by CRISPR/Cas9 in Stem Cells
Source: PubMed Central journal article supplement — Stem Cell Reports. 2020 Aug 13;15(3):677–93. doi: 10.1016/j.stemcr.2020.07.015 (PMC7486222; doi:10.1016/j.stemcr.2020.07.015), 2020-08-13
Supplement: mmc1.pdf [file mmc1.pdf]

**Stem Cell Reports, Volume 15**

**Supplemental Information**

**Mutation-Specific Guide RNA for Compound Heterozygous Porphyria  
On-target Scarless Correction by CRISPR/Cas9 in Stem Cells**

**Florence Prat, Jérôme Toutain, Julian Boutin, Samuel Amintas, Grégoire Cullot, Magalie Lalanne, Isabelle Lamrissi-Garcia, Isabelle Moranvillier, Emmanuel Richard, Jean-Marc Blouin, Sandrine Dabernat, François Moreau-Gaudry, and Aurélie Bedel**

**Supplemental fig 1: TIDER analyses related to Figure 2B and 3A**

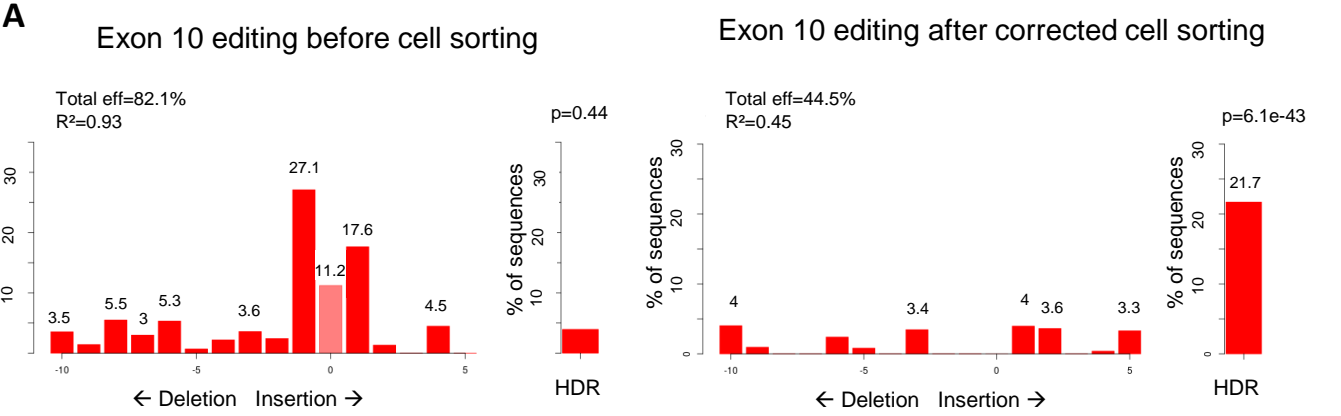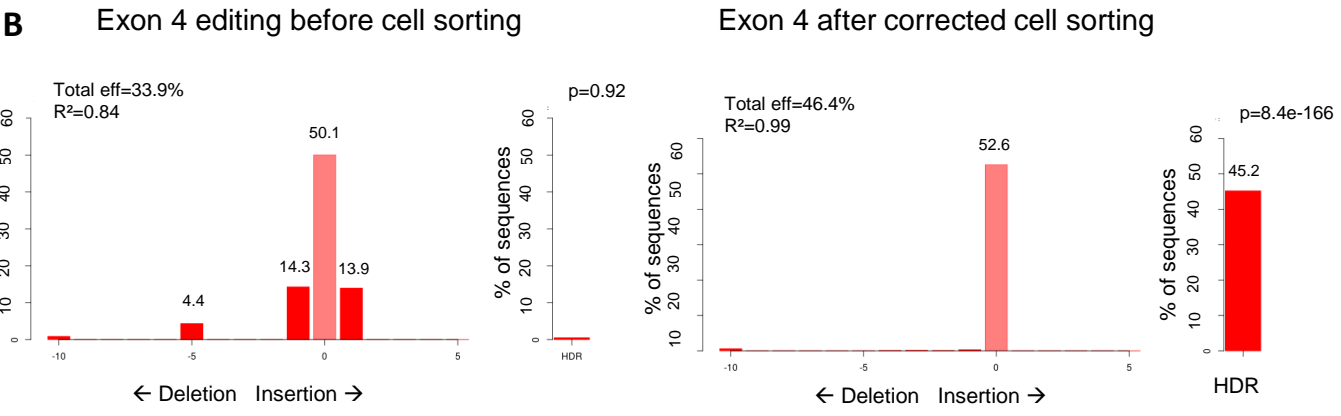

## Supplemental fig 2: off-targets analysis of UROS exon 4 targeting (related to figure 7)

| Position | Locus                                | Off-target sequence     | Mismatche(s) number | MIT score | % InDels |
|----------|--------------------------------------|-------------------------|---------------------|-----------|----------|
| 1        | intron:VSIG10L                       | GGAAGGGGCTGAGTTACGTTTGG | 3                   | 0,9       | <b>7</b> |
| 2        | intron:KCTD5                         | GGCAGCAGCAGGGTTATGTTGGG | 3                   | 0,6       | <loq     |
| 3        | intron:AC141586.5                    | GGCAGCAGCAGGGTTATGTTGGG | 3                   | 0,6       | <loq     |
| 4        | intergenic:RP11-157N3.1-RP11-411H5.1 | GGAATCATCAGAGTTACTTTGGG | 3                   | 0,6       | <loq     |
| 5        | intergenic:MRPS11P1-RP5-1177M21.1    | GGACCCAGCTGAGTTAAGTTTGG | 3                   | 0,5       | <loq     |
| 6        | intergenic:PLCB1-AL121898.1          | GGAACAAGGGGAGTTACGTTAGG | 4                   | 0,4       | <b>5</b> |
| 7        | intergenic:KLF4-RP11-438P9.1         | GAAAGCAGCAGAGTCATGTTGGG | 3                   | 0,3       | <loq     |
| 8        | intron:DSCR8                         | GGAAGCAGCAGAGTTACAGTTGG | 2                   | 0,3       | <loq     |
| 9        | intergenic:ATP6V0E1P4-AL591415.1     | GGAGTCAGCACAGTTAGGTTAGG | 4                   | 0,3       | <loq     |
| 10       | intergenic:TACR3-RNU6-635P           | AGAAGCATCAGGGTTATGTTAGG | 4                   | 0,3       | <loq     |

CRISPOR-predicted off-targets analysis. Each predicted off-target was sequenced and analysed by ICE to evaluate Indels.

**Supplemental fig 3: hiPSC-CEP karyotype after three rounds of Cas9 gRNA-4 nucleofections (related to figure 7)**

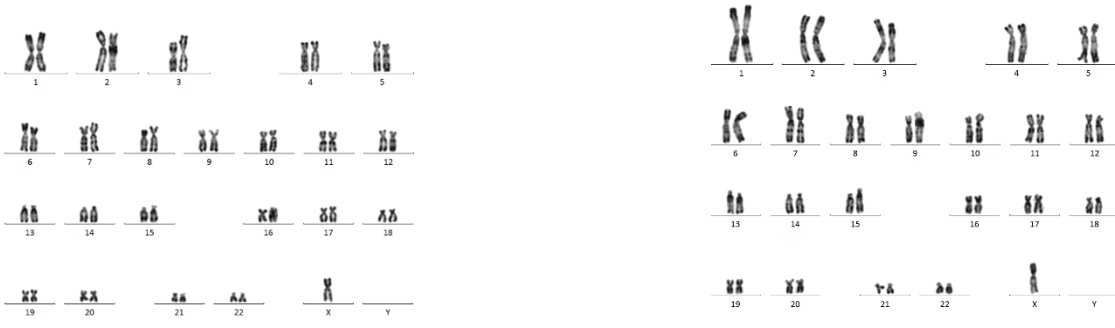

CEP-hiPSC

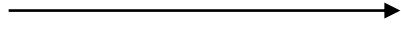

Exon 4 edited CEP-hiPSC

Supplementary table 1: Primers sequence (5' to 3'), related to Figure 1D

## PCR Primers sequence (5' to 3')

|                             |                          |
|-----------------------------|--------------------------|
| <i>UROS</i> exon 4 Forward  | TAGTTCCAGGCACATAGTAAGCAC |
| <i>UROS</i> exon 4 Reverse  | AGGAGGTGAACAACGAATAGACAG |
| <i>UROS</i> exon 10 Forward | GAGAGCGTGGATGCAGA        |
| <i>UROS</i> exon 10 Reverse | ACAGCAACCATACACTCAG      |

## sgRNA sequence (5' to 3')

|                 |                      |
|-----------------|----------------------|
| Exon 4 gRNA-4   | GGAAGCAGCAGAGTTACGTT |
| Exon 10 gRNA-10 | TGCAGCCATCGGCCCCACTA |

## HDR template sequence (5' to 3')

|                       |                                                                                     |
|-----------------------|-------------------------------------------------------------------------------------|
| Exon 4<br>80nt-ssODN  | CATTTTTACCAGCCCCAGAGCAGTGGAAAGCAGCAGAGCTCTGT<br>TTGGAGCAAACAATAAACTGAAGGTGAGGGTGGGT |
| Exon 10<br>75nt-ssODN | GTTTTCTCTTCTGTCTTTATAGTTTGCAGCCATCGGGCCCACTAC<br>GGCTCGCGCGCTGGCCGCCAGGGCCTTCC      |

## PCR Primers for off-target analysis (5' to 3')

|                       |                         |
|-----------------------|-------------------------|
| Off-target 1 Forward  | TTCCTCGCTAAGTGGGTAGC    |
| Off-target 1 Reverse  | GGGGCCAGAAAGAGGATAAG    |
| Off-target 2 Forward  | AGGTGAAGGTTTTGTGTGCGA   |
| Off-target 2 Reverse  | CAGTGAGGAATGAGGGTGGAG   |
| Off-target 3 Forward  | AGGTGAAGGTTTTGTGTGCGA   |
| Off-target 3 Reverse  | CAGTGAGGAATGAGGGTGGAG   |
| Off-target 4 Forward  | GCGTTCTTTTCCCTTACATCCTC |
| Off-target 4 Reverse  | GCATACAAAATGTCCCAAA     |
| Off-target 5 Forward  | TCCGCTCTTTGGTGTTTAGC    |
| Off-target 5 Reverse  | CAGGCTAAGTCTGGGTCTGG    |
| Off-target 6 Forward  | CTTCCCTCCTCAACACAGGT    |
| Off-target 6 Reverse  | CAGGCAATGAGAAGGTGACA    |
| Off-target 7 Forward  | ACCCTCTGTCTTGTGTAGACT   |
| Off-target 7 Reverse  | AGCCTCAGCCTCATCATGTTT   |
| Off-target 8 Forward  | TTGATAGGAAGAAGGAATGCTG  |
| Off-target 8 Reverse  | TTCCTCCTCTTCCCTCCATCTC  |
| Off-target 9 Forward  | GACTTGCCTGTTTCGGACAT    |
| Off-target 9 Reverse  | CAGAGCCACCAAATGCAAG     |
| Off-target 10 Forward | ACTGTCCACCATTTCTCACCA   |
| Off-target 10 Reverse | ATCCTTCTCTTTGCCAGACC    |
